# Supplementary material for: Geriatric syndromes are potential determinants of the medication adherence status in prevalent dialysis patients
Source: PeerJ. 2016 Jun 14;4:e2122. doi: 10.7717/peerj.2122 (PMC4911948; doi:10.7717/peerj.2122)
Supplement: File S1 [file peerj-04-2122-s001.xls]

## Sheet: Sheet1
Patient	Polypharmacy_5 pills	Total medication count	Age	Gender	Vintage	DM (1)	HTN (0)	CHF (3)	Cirrhosis (2)	Malignancy (2)	Dialysis_comorbidity_index	ESRD_Etiology_code	Disposable Income	Frailty+Pre-frailty	Alb	BUN	Cre	K	Ca	P	Ca*P	URR	Hb	T-cho	TG	Na	Ferritin	TSAT	MMAS_total	MMAS_high_or_low
1	1	8.5	69	0	7.833	0	1	0	1	0	2	9	1	1	3.57	92.4	12.46	4.6	7.94	5.7	45.3	78.1	8.8	176	80	128	701	71.4	0	1
2	1	15.5	50	1	2.833	1	1	1	1	0	6	1	1	0	3.67	93.4	15.67	4.9	8.47	6.7	56.7	68.2	11.3	139	160	134	107	35.8	2	0
3	1	14.5	67	1	5	1	1	1	0	0	4	1	0	1	3.92	74.7	7.66	6.1	8.65	5	43.3	79	9.5	81	61	138	789	28.8	0	1
4	1	14.5	80	0	4.833	0	1	0	0	0	0	9	1	0	3.77	43.5	7.52	6.3	8.98	5	44.9	78.2	11.5	178	328	133	468	18.5	2.25	0
5	1	15	83	0	4.166	1	1	1	0	0	4	3	0	1	3.69	68.6	6.89	4.6	7.71	5.3	40.9	81.8	9	124	84	127	966	24.8	3.25	0
6	1	7	74	0	3.416	0	0	0	0	1	2	6	1	1	3.48	67.8	7.98	4	9.82	5.6	55	76.1	9.3	220	342	137	931	43.4	0.25	0
7	0	0	66	1	3	0	1	0	0	0	0	9	1	1	3.86	103.6	13.53	4.4	8.41	7.7	64.8	99	11.5	157	157	136	647	28	1.25	0
8	1	9	85	0	4.333	1	1	1	0	0	4	1	0	1	3.94	81.4	8.63	5.4	9.92	3.5	34.7	76.2	9.9	155	228	134	513	29.5	0.25	0
9	1	8.5	82	1	3.083	1	1	0	0	0	1	2	1	1	3.1	58.7	8.47	3.6	7.54	4.2	31.7	68.5	9.4	160	58	140	405	28.6	3.25	0
10	1	12.5	61	1	5.5	1	0	0	0	0	1	1	0	1	3.54	60.8	9	3.8	8.2	6.5	53.3	80.4	9.1	97	105	135	2423	24.7	3.75	0
11	1	11	57	1	0.416	1	1	0	0	0	1	1	1	0	4.02	103.1	11.38	4.7	8.47	6.3	53.4	59.6	11.5	149	162	141	137	12.6	4	0
12	1	10.5	76	0	9.416	0	1	0	0	0	0	9	0	1	4.21	80	11.62	4.5	9.48	3.5	33.2	76.8	10.2	149	56	139	423	30	1	0
13	1	12	60	0	2.83	0	1	0	0	0	0	9	1	0	3.88	101.2	9.85	4.7	6.99	5.2	36.3	78.3	10	137	111	132	478	37.7	4.5	0
14	1	9	58	0	3.087	1	1	0	0	1	3	1	0	1	3.57	51.6	7.91	4.9	9.63	5.6	53.9	77.1	11.4	170	72	129	670	24	1.25	0
15	0	3	74	1	3.333	0	0	1	0	1	5	9	1	0	3.62	60.9	12.48	4.3	8.3	3.5	29.1	75	9.7	107	59	140	234	26.5	0	1
16	1	15	56	1	2.083	1	1	0	0	0	1	1	1	1	4.22	79.9	13.05	4.8	7.88	10.2	80.4	71	8.7	163	438	125	640	24	1.25	0
17	1	15.5	89	0	5.25	1	1	1	0	0	4	1	1	1	3.69	125.9	8.07	4.6	8.23	7.3	60.1	78.2	8.7	140	325	130	647	31.4	2.25	0
18	1	18	67	1	5.17	0	1	0	0	0	0	9	0	0	4.47	80.7	12.28	4.3	9.14	4	36.6	75	9.7	172	320	140	525	19.7	0	1
19	1	7.25	75	1	3.167	1	1	0	1	0	3	1	0	1	3.6	100.7	9.41	4.6	8.79	5.8	51	73.4	5.7	114	265	138	5314	100	3.25	0
20	1	11.5	57	0	12.17	0	1	0	0	0	0	9	0	1	3.95	89.3	11.98	5.5	8.17	5.2	42.5	77.4	9.4	200	143	136	554	20.6	0	1
21	1	18	77	0	1.917	1	1	0	0	0	6	1	0	1	3.61	71.7	8.62	5.5	9.69	5.4	52.3	76.8	8.2	259	469	135	721	19.9	1.25	0
22	1	14.3	66	1	5.167	0	1	0	0	0	0	9	0	0	4.05	49.9	10.21	3.8	9.72	4.3	41.8	76.8	8.7	196	290	135	194	11.1	5.5	0
23	1		67	1	0.25	1	1	0	0	1	3	2	1	0	3.89	56.9	8.21	4	8.41	3.3	27.8	67.8	9	155	60	132	564	27.7	0	1
24	1	10.5	63	0	1.167	1	1	0	0	0	2	1	1	1	3.76	80.6	8.91	3.8	9.3	3.6	33.5	81.8	9.9	166	131	131	886	31.9	2.25	0
25	1	11	62	0	2.333	1	1	0	0	0	1	1	0	1	4.41	117.2	12.46	5.3	9.85	5.9	58.1	80	10.8	159	87	135	723	22.3	1.25	0
26	1	12	82	0	1.833	1	1	0	0	0	1	1	1	1	3.93	63.4	11.98	5.5	10.63	5.8	61.7	73.3	9.5	190	131	136	477	32.7	0	1
27	1	13.5	71	0	1.917	1	1	0	0	0	1	1	1	1	4.16	72.3	10.81	5.7	9.63	5.3	51	76.5	8.7	156	160	131	328	12.4	0.5	0
28	1	8	32	0	4	0	1	0	0	0	0	4	0	0	4.06	98.9	10.44	4.1	8.67	7.6	65.9	74.8	8.4	153	96	136	243	38.5	4.25	0
29	1	9.5	86	0	0.25	1	1	0	0	0	1	1	1	1	2.99	69.5	8.21	4	7.84	2.1	16.5	74.2	8.8	150	101	135	390	26.4	0	1
30	0	2	84	0	0.5	1	1	1	0	0	4	1	0	1	2.94	46.1	5.72	3.9	8.86	5.1	45.2	82	10.1	124	105	134	518	30.8	1.25	0
31	1	15.5	56	1	0.5	1	1	0	0	0	1	9	0	1	3.83	107.4	17.49	5.3	8.23	7.6	83.1	68.9	12.6	110	87	134	31.9	9.1	4	0
32	1	13.5	56	0	1.9167	0	1	0	0	0	0	2	1	0	4.11	92.8	13.77	4.4	9.03	4.4	39.7	68.9	8.3	136	114	138	394	24.7	4	0
33	1	21.5	79	0	10.587	1	1	0	0	0	1	1	1	1	3.51	56.2	9.09	3.9	8.75	4.1	35.9	69.6	10.1	234	254	134	648	18.4	2.5	0
34	1	14.2	70	1	4.667	0	1	1	1	0	5	9	0	0	3.96	80.4	14.16	4.8	8.84	7.3	64.5	71.8	7.9	101	64	141	531	23.3	3.25	0
35	1	11.7	71	0	10	0	1	1	0	0	3	9	0	1	3.28	72.8	8.23	3.9	9.87	3.5	34.5	76.5	8.7	182	114	132	650	22.6	4.5	0
36	1	11	53	1	2.087	1	1	0	0	0	1	3	0	1	3.52	77.2	10.88	4.8	8.37	5.1	42.7	69.6	11.6	170	41	136	248	37	2.25	0
37	1	6.5	66	1	4.75	0	1	0	0	0	0	3	0	0	3.88	90.3	13.43	5.6	10.55	5.7	60.1	72.9	11.7	164	88	137	24.9	27.1	2	0
38	1	22.5	65	0	3.41	0	1	0	0	0	0	9	0	1	3.91	88.9	9.52	5.5	9.3	4.6	42.8	75.7	8.4	102	56	139	793	19	0.25	0
39	1	15.7	35	1	3.0867	0	1	0	0	0	0	6	1	0	4.24	59.9	15.88	4.8	8.98	6.7	60.2	69.6	12.3	120	72	127	18.2	11.8	5.5	0
40	1	15.5	65	1	1.6667	0	0	0	0	0	0	7	1	1	3.5	104.8	9.88	5.7	9.29	5	46.5	77.8	8.9	155	86	138	1411	17.9	0.25	0
41	1	16	61	0	1.5833	0	1	0	0	0	0	9	0	0	3.75	125.9	10.97	5.7	10.61	4.6	48.8	74.4	8.6	172	87	137	94.3	14.8	2.25	0
42	1	6	80	0	1.1667	0	1	0	0	0	0	9	1	1	3.93	78.8	13.07	4.6	8.69	5.6	48.7	75.8	9.8	140	155	138	890	43.6	0.25	0
43	1	28.5	76	0	1.087	1	1	0	0	0	1	1	1	1	3.89	80.4	11.27	4.7	9.5	7.4	70.3	69.4	9.4	108	193	132	506	20.5	1.25	0
44	1	13.5	71	1	1.04	1	1	0	0	1	3	1	1	0	3.85	81	12.09	4.1	8.31	5	41.6	64	11.1	255	302	134	83.1	22.3	5.75	0
45	1	17.5	57	0	0.6667	1	1	0	0	0	1	1	0	1	3.96	84.3	9.7	4.8	9.17	5.2	47.7	79.1	9.8	229	250	131	1286.3	50.6	1	0
46	1	6.5	73	1	0.583	0	1	0	0	1	0	2	0	1	4.06	111.5	10.72	4.4	9.51	4.3	40.9	74	10.1	136	83	138	435	30.9	1	0
47	1	8.5	78	1	1.58	0	1	0	0	0	0	9	0	1	3.26	75.8	9.28	4.1	9.39	4.3	40.4	73.2	10.1	113	62	140	280	20.9	5.5	0
48	1	8.25	73	0	0.8333	1	1	0	0	0	1	1	0	0	3.34	63.5	9.09	4.8	8.79	3.6	31.6	73.1	10.1	177	109	132	476	28.2	2.5	0
49	1	18	67	1	0.6667	0	1	0	0	0	0	9	1	0	4.24	99.9	12.95	4.4	9.17	7.7	70.6	64.2	9	166	263	139	404	22	2	0
50	1	12	70	0	4.1667	0	0	1	0	0	3	9	0	1	3.75	61.4	10.21	3.6	8.97	4.5	40.4	76.5	9.9	179	82	141	599	28.2	0.25	0
51	1	7.5	71	0	6.8333	0	1	1	0	0	3	9	0	1	3.85	85.2	10.04	4.9	8.69	2.6	22.6	74.9	9.3	198	284	133	601	35.2	1.5	0
